# Supplementary material
Source: publisher site journal article supplement (https://kjim.org/upload/media/kjim-2024-088-Supplementary-Fig-2.pdf)
Supplement: Supplementary file 1 [file kjim-2024-088-Supplementary-Fig-2.pdf]

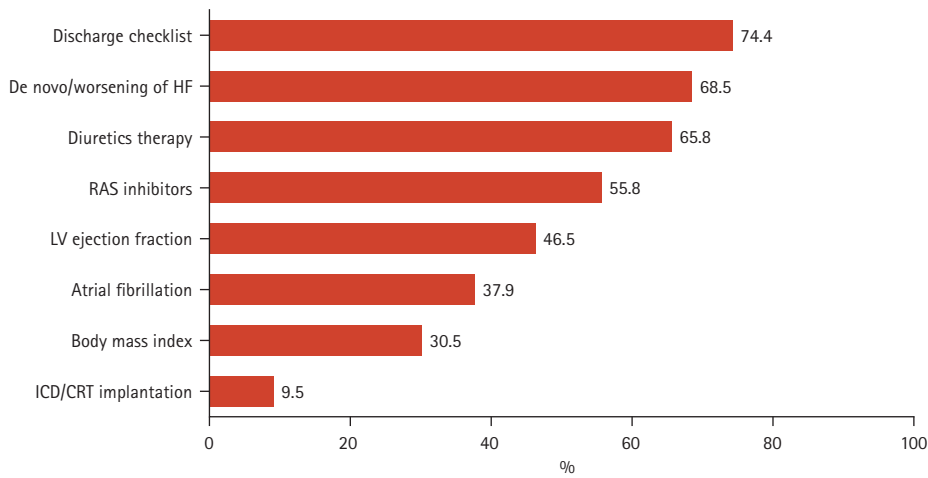

**Supplementary Figure 2.** Variable selection by a bootstrap resampling procedure based on Cox regression. Relative frequency (%) with which each candidate variable was selected using forced entry model selection in 1,000 bootstrap samples drawn from the HF discharge checklist cohort. HF, heart failure; RAS, renin-angiotensin system; LV, left ventricular; ICD/CRT, implantable cardioverter defibrillator/cardiac resynchronization therapy.
